# Supplementary material
Source: PubMed Central journal article supplement (PMC2999922)
Supplement: supp_M009480_jlr.M009480-1.pdf [file supp_M009480_jlr.M009480-1.pdf]

Supplementary Figure 1

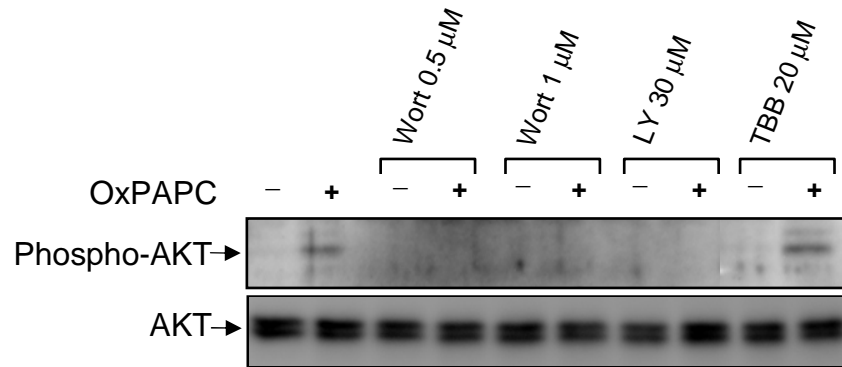

**Supplementary Figure 1. Effect of PI3K and CK2 inhibitors on OxPAPC-induced AKT phosphorylation.** HUVECs were pretreated with wortmannin (0.5 and 1  $\mu\text{M}$ ), LY294002 (30  $\mu\text{M}$ ) or TBB (20  $\mu\text{M}$ ) for 30 minutes, thereafter cells were stimulated with OxPAPC (130  $\mu\text{M}$ , 15 minutes). Western blot of cell lysates were probed with antibodies against phosphorylated and total AKT.

Supplementary Figure 2

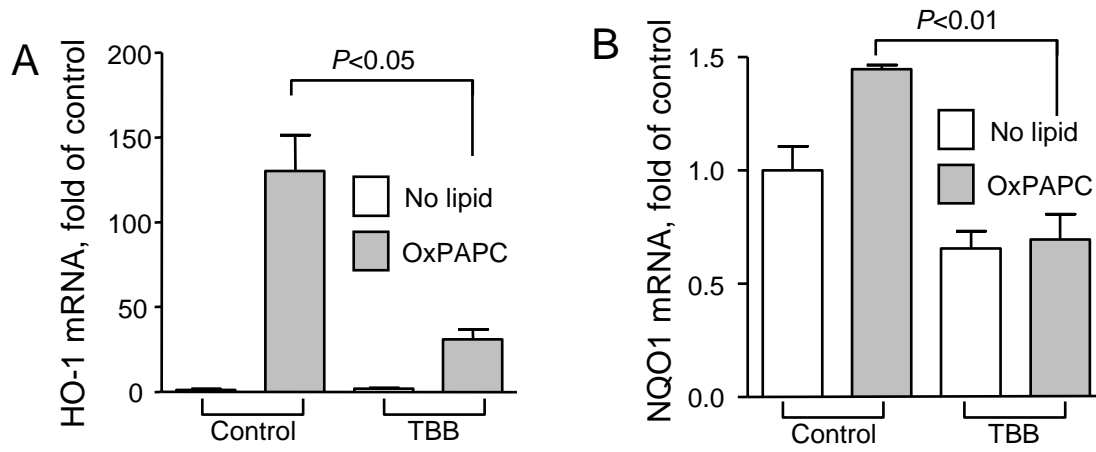

**Supplementary Figure 2. TBB inhibits induction of NRF2-dependent genes HO-1 and NQO1 by OxPAPC.** Before stimulation with OxPAPC (130  $\mu\text{mol/L}$ ) HUVECs were pretreated either with vehicle or TBB (20  $\mu\text{mol/L}$ ) for 30 minutes. After 6 hours stimulation was stopped by addition of Trizol reagent. Levels of HO-1 and NQO1 mRNAs (A and B, respectively) were quantified by RT-qPCR and normalized to  $\beta 2$ -microglobulin mRNA levels.

Supplementary Figure 3

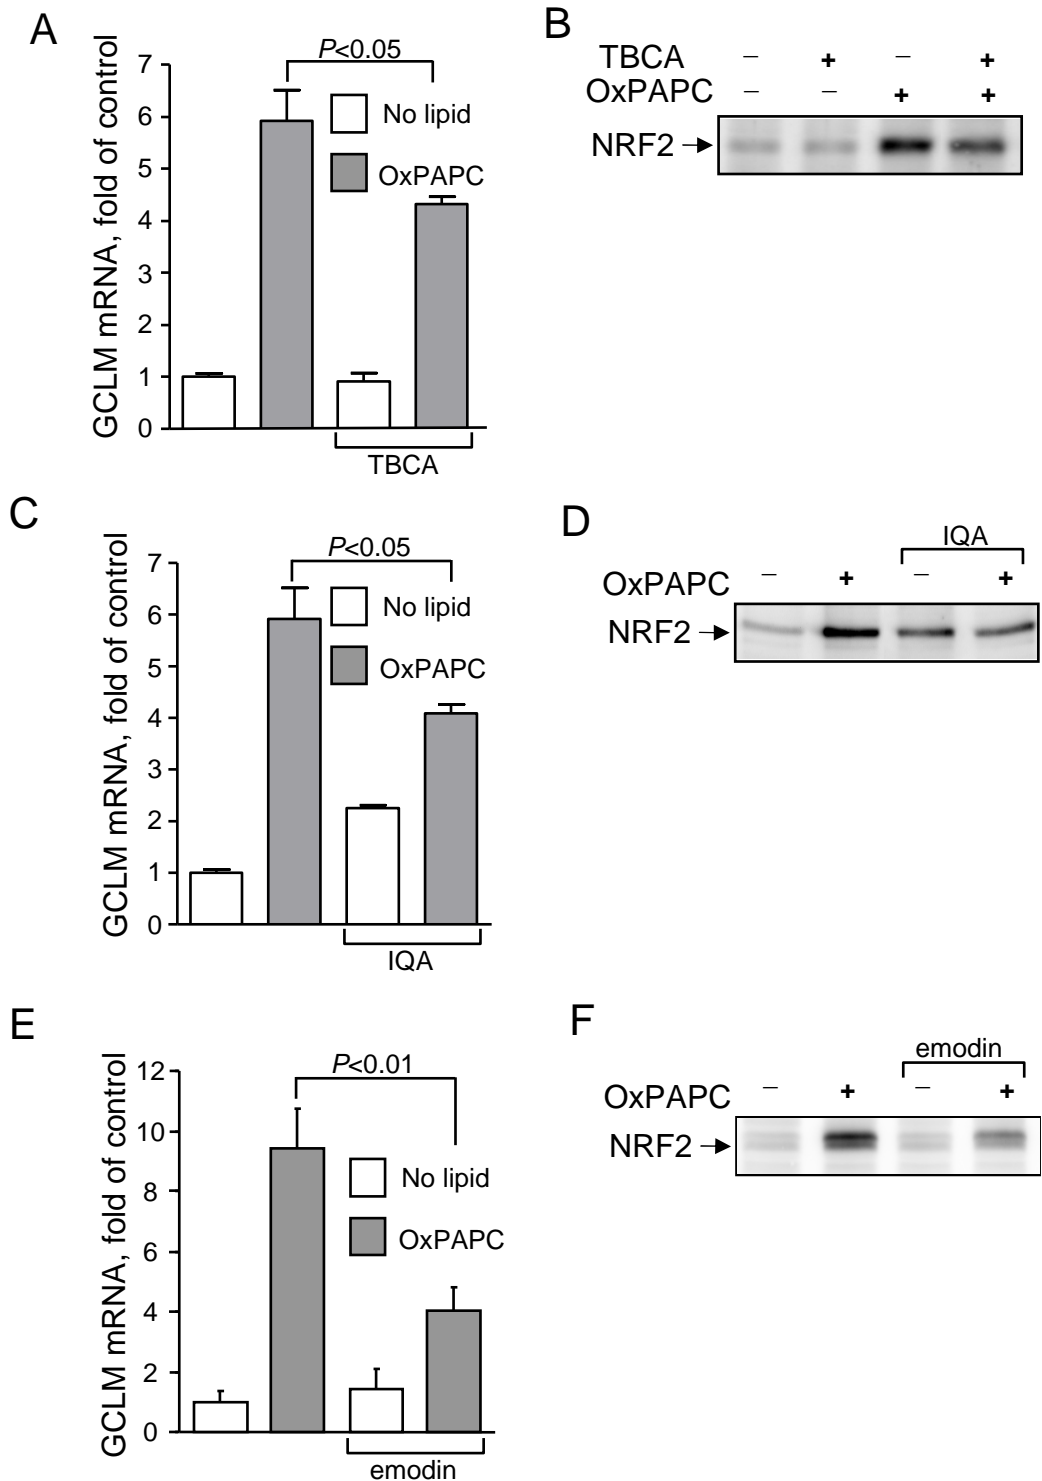

**Supplementary Figure 3. Effects of CK2 inhibitors TBCA, IQA and emodin on upregulation of GCLM mRNA and NRF2 protein levels by OxPAPC.** HUVECs were pretreated for 30 minutes with TBCA (20  $\mu\text{mol/L}$ ) (A and B), IQA (20  $\mu\text{mol/L}$ ) (C and D) or with emodin (10  $\mu\text{mol/L}$ ) (E and F) before stimulation with OxPAPC (130  $\mu\text{mol/L}$ ). A, C and E, levels of GCLM mRNA were quantified by RT-qPCR and normalized to  $\beta 2$ -microglobulin mRNA. B, D and F, Western blot analysis of NRF2 levels. OxPAPC stimulation was stopped after 2 hours. Cell lysates were probed with antibodies against NRF2.

Supplementary Figure 4

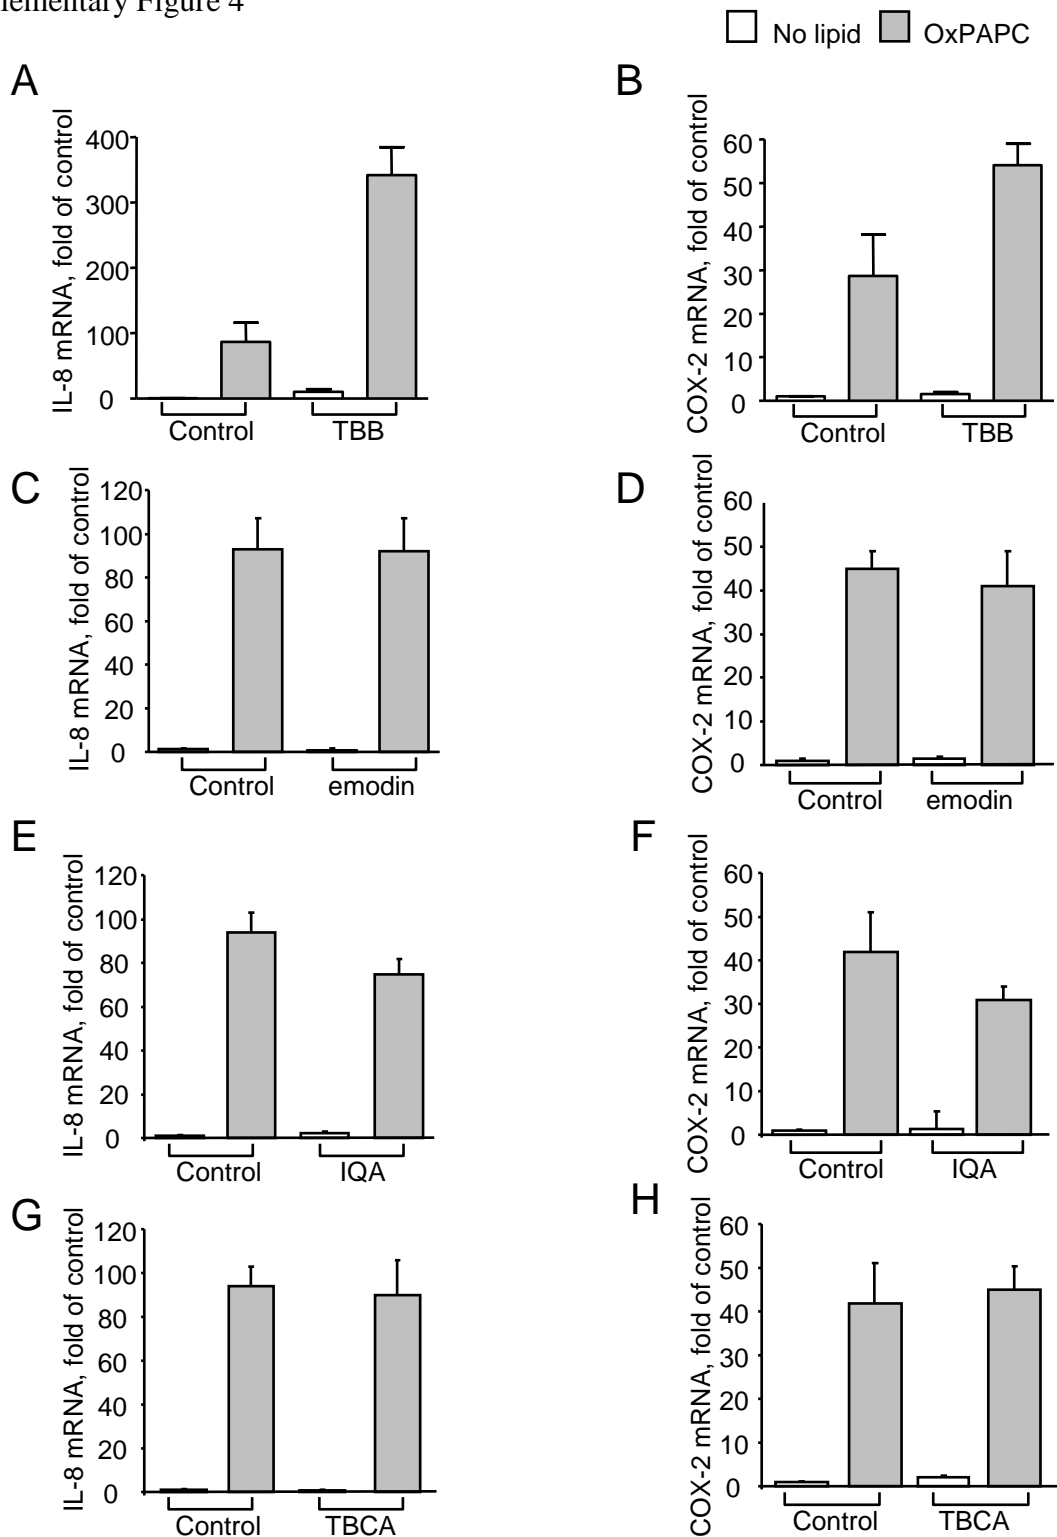

**Supplementary Figure 4. Effect of CK2 inhibitors TBB, emodin, TBCA, and IQA on induction of IL-8 and COX-2 mRNA levels by OxPAPC.** HUVECs were pretreated for 30 minutes with TBB (20  $\mu\text{mol/L}$ ) (A and B), emodin (10  $\mu\text{mol/L}$ ) (C and D), IQA (20  $\mu\text{mol/L}$ ) (E and F) or with TBCA (20  $\mu\text{mol/L}$ ) (G and H) before stimulation with OxPAPC (130  $\mu\text{mol/L}$ ). Levels of IL-8 (A,C,E and G) and COX-2 (B,D,F and H) mRNAs were quantified by RT-qPCR and normalized to  $\beta 2$ -microglobulin mRNA.

Supplementary Figure 5

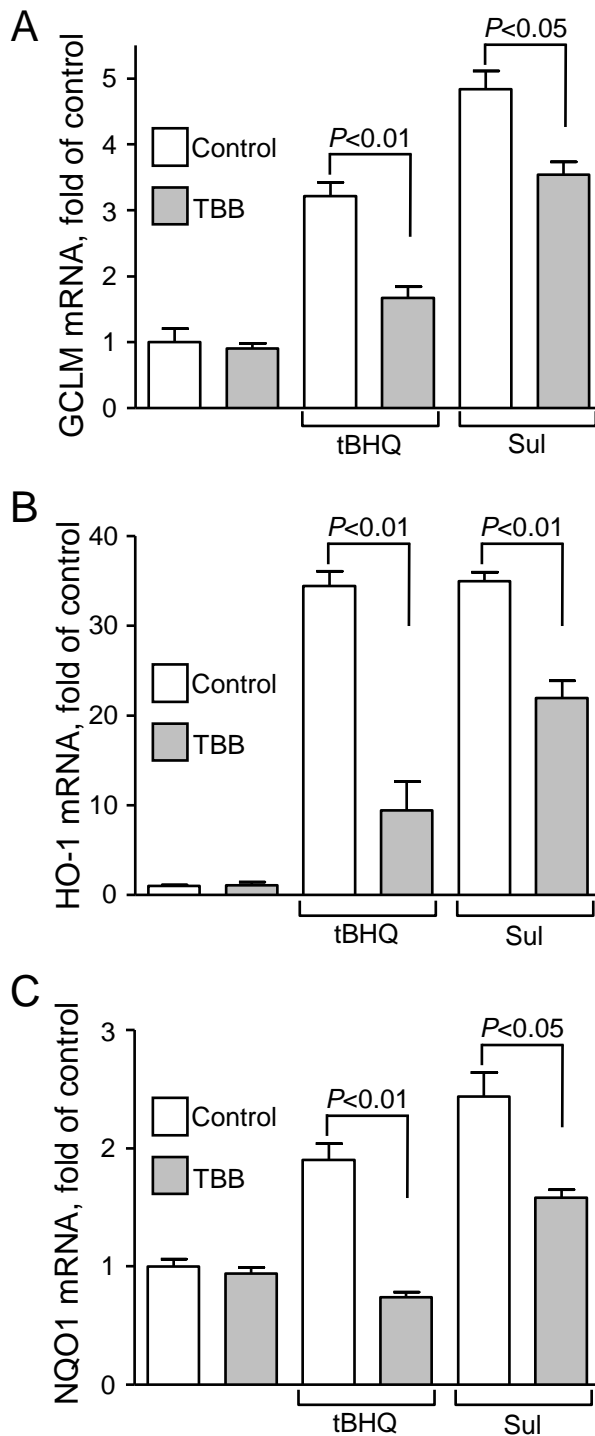

**Supplementary Figure 5. Induction of electrophilic genes by tBHQ and sulforaphane is attenuated by CK2 inhibitor TBB.** HUVECs were pretreated for 30 minutes with TBB (20  $\mu\text{mol/L}$ ) and thereafter sulforaphane (5  $\text{mmol/L}$ ) or tBHQ (50  $\mu\text{mol/L}$ ) were added. After 6 hours stimulation was stopped by Trizol reagent addition. GCLM (A), HO-1 (B) and NQO1 (C) mRNA levels were quantified by RT-qPCR and normalized to  $\beta 2$ -microglobulin mRNA levels.
